# Supplementary material
Source: PubMed Central journal article supplement (PMC6069634)
Supplement: NIHMS452659-supplement-Supp_Material.pdf [file NIHMS452659-supplement-Supp_Material.pdf]

High ranking learning objectives:

|                                                                      |                                                                                                                                                                         |             |
|----------------------------------------------------------------------|-------------------------------------------------------------------------------------------------------------------------------------------------------------------------|-------------|
| I. Scientific Foundations of Medicine (Year I):                      |                                                                                                                                                                         |             |
|                                                                      | <b>Basic Neurobiology of Pain pathways</b>                                                                                                                              |             |
| <b>1. Anatomy and Physiology</b>                                     | <b>1. Anatomy and Physiology</b>                                                                                                                                        | <b>3.15</b> |
| •                                                                    | Know that higher level nociceptive processing occurs in both the limbic and the somatosensory regions of the brain, connections to basal ganglia may influence behavior | 3.57        |
| <b>2. Neurochemistry</b>                                             | <b>2. Neurochemistry</b>                                                                                                                                                | <b>3.29</b> |
| II. Pain Intersession (Year I (late)):                               |                                                                                                                                                                         |             |
|                                                                      | <b>Pain Core</b>                                                                                                                                                        |             |
| <b>1. Epidemiology, public health and multicultural perspectives</b> | <b>1. Epidemiology, public health and multicultural perspectives</b>                                                                                                    | <b>3.55</b> |
| •                                                                    | Be able to distinguish between acute and chronic pain                                                                                                                   | 3.93        |
| •                                                                    | Know the basic properties of psychophysical responses to acute pain in populations                                                                                      | 3.71        |
| •                                                                    | Recognize prevalence and know major sources of chronic pain                                                                                                             | 3.86        |
| •                                                                    | Recognize the socioeconomic costs of pain                                                                                                                               | 3.57        |
| <b>2. Pain terminology and pain assessment</b>                       | <b>2. Pain terminology and pain assessment</b>                                                                                                                          | <b>3.43</b> |
| •                                                                    | Know the IASP definition of pain                                                                                                                                        | 3.86        |
| •                                                                    | Know the formal definitions of mechanism-based classifications of pain, e.g., nociceptive                                                                               | 3.86        |
| <b>3. Approach to the patient with pain</b>                          | <b>3. Approach to the patient with pain</b>                                                                                                                             | <b>3.45</b> |
| •                                                                    | Know how to structure the interaction into assessment, diagnosis and treatment                                                                                          | 3.79        |
| •                                                                    | Know how to construct a pain differential diagnosis and of the relevance of a detailed history to this process                                                          | 3.86        |
| •                                                                    | Know of the importance of an exam and diagnostic testing to obtain an accurate diagnosis                                                                                | 3.93        |
| <b>4. Pain Psychophysics and mechanisms</b>                          | <b>4. Pain Psychophysics and mechanisms</b>                                                                                                                             | <b>3.31</b> |
| •                                                                    | Be aware of some challenges inherent to evaluating a subjective                                                                                                         | 3.62        |

phenomenon

|                                           |                                                                                                                                                                  |             |
|-------------------------------------------|------------------------------------------------------------------------------------------------------------------------------------------------------------------|-------------|
| <b>5. Behavioral perspectives on pain</b> | <b>5. Behavioral perspectives on pain</b>                                                                                                                        | <b>3.61</b> |
| •                                         | Know the non-specific effects of treatment and that it is essential to distinguish response due to improvement by natural history and placebo effects            | 3.43        |
| •                                         | Be familiar with the prevalence of placebo response, the patient characteristics that influence placebo response and the relevant characteristics of providers   | 3.43        |
| •                                         | Demonstrate some understanding how placebo effects occur, e.g., learning, decreased anxiety, expectation and endorphin effects                                   | 3.43        |
| •                                         | Know that pain typically has significant effects on behavior including sleep                                                                                     | 3.79        |
| •                                         | Know that chronic, severe pain has an impact on psychological functioning                                                                                        | 3.79        |
| •                                         | Know that psychosocial factors and co-morbid illness influence pain treatment response                                                                           | 3.79        |
| <b>Pharmacology</b>                       |                                                                                                                                                                  |             |
| <b>1. COX inhibitors</b>                  | <b>1. COX inhibitors</b>                                                                                                                                         | <b>3.44</b> |
| •                                         | Know the major uses of non-specific COX1/2 inhibitors (NSAIDs) and know that these agents are not effective for the treatment of neuropathic pain                | 3.57        |
| •                                         | Know the advantages and disadvantages of COX2 inhibitors                                                                                                         | 3.57        |
| •                                         | Recognize that acetaminophen is a COX3 inhibitor and has distinct properties i.e. liver toxicity, analgesia and antipyretic without anti-inflammatory properties | 3.57        |
| <b>2. Neuromodulating agents</b>          | <b>2. Neuromodulating agents</b>                                                                                                                                 | <b>3.63</b> |
| •                                         | Know that specific anticonvulsants may be effective in certain pain conditions                                                                                   | 3.71        |
| •                                         | Know that anticonvulsants play a major role in adjunctive therapy of many chronic pain states but may have dangerous side effects requiring long-term monitoring | 3.71        |
| •                                         | Know that tricyclic antidepressants have been demonstrated over several decades to be effective in the treatment of neuropathic                                  | 3.71        |

pain, cardiac side effects predominate

|                                                  |                                                                                                                                                                     |             |
|--------------------------------------------------|---------------------------------------------------------------------------------------------------------------------------------------------------------------------|-------------|
| •                                                | Know that local anesthetics and other sodium channel agents can be effective against both acute and chronic pain                                                    | 3.64        |
| •                                                | Know topical application of various agents may be of use in some circumstances                                                                                      | 3.57        |
| <b>3. Opioids</b>                                | <b>3. Opioids</b>                                                                                                                                                   | <b>3.76</b> |
| •                                                | Know that pure opioid agonists, partial opioid agonists and mixed agonist/antagonists are all in clinical use and be able to recognize common members of each class | 3.71        |
| •                                                | Know that the administration of a mixed agonist/antagonist as well as an opioid antagonist can induce withdrawal in someone treated with opioid agonists            | 3.71        |
| •                                                | Know that the efficacy of certain opioids is limited by metabolism in a proportion of the population and recognize strategies to adjust medications appropriately   | 3.64        |
| •                                                | Know the dose limiting side effects of the major opiates and recognize appropriate strategies to address those side effects                                         | 3.79        |
| •                                                | Know the symptoms of opiate overdose                                                                                                                                | 3.86        |
| •                                                | Be familiar with the classification system for controlled substances and recognize that combination narcotic analgesics have a lower level of control on their use  | 3.86        |
| <b>4. Applied basic science/drug development</b> | <b>4. Applied basic science/drug development</b>                                                                                                                    | <b>2.59</b> |
| <b>Clinical Skills</b>                           |                                                                                                                                                                     |             |
| <b>1. Interview skills</b>                       | <b>1. Interview skills</b>                                                                                                                                          | <b>3.69</b> |
| •                                                | Understand basic concepts of pain measurement especially the NRS                                                                                                    | 3.57        |
| •                                                | Know the elements of a detailed pain history, recognize that patients may have multiple painful conditions, details are required for each                           | 3.79        |
| •                                                | Understand the difference between spontaneous and evoked pain                                                                                                       | 3.57        |
| •                                                | Demonstrate the ability to obtain detailed information about a pain condition                                                                                       | 3.71        |
| •                                                | Demonstrate the ability to collaborate with the patient in obtaining                                                                                                | 3.64        |

|                                                        |                                                                                                                                                                                                                                                         |             |
|--------------------------------------------------------|---------------------------------------------------------------------------------------------------------------------------------------------------------------------------------------------------------------------------------------------------------|-------------|
|                                                        | pain ratings                                                                                                                                                                                                                                            |             |
| •                                                      | Exhibit empathetic responses to a patient with pain as a primary complaint                                                                                                                                                                              | 3.86        |
| <b>2. Exam skills</b>                                  | <b>2. Exam skills</b>                                                                                                                                                                                                                                   | <b>3.82</b> |
| •                                                      | Understand the primacy of examining the body part that hurts                                                                                                                                                                                            | 3.79        |
| •                                                      | Understand the concept of pain behavior                                                                                                                                                                                                                 | 3.79        |
| •                                                      | Demonstrate communication with a patient while examining a painful part                                                                                                                                                                                 | 3.86        |
| •                                                      | Be able to identify the major exam features that typify painful parts, e.g. tumor                                                                                                                                                                       | 3.79        |
| •                                                      | Know how to document the examination of a patient with pain                                                                                                                                                                                             | 3.86        |
| •                                                      | Be aware of basic findings for major pain conditions e.g. radiculopathy, arthritis                                                                                                                                                                      | 3.86        |
| <b>3. Assessment decisions and treatment decisions</b> | <b>3. Assessment decisions and treatment decisions</b>                                                                                                                                                                                                  | <b>3.46</b> |
| •                                                      | Know that multidisciplinary care includes medical care, interventions, rehabilitation, and clinical psychology but recognize that communication is essential and referral does not complete a physician's responsibility to the patient                 | 3.69        |
| •                                                      | Know that appropriate assessment tools may include electro-diagnostic studies, bloodwork, imaging e.g., MRI, CT, PET and bone scan; Demonstrate sufficient knowledge to describe the basic characteristics of these tests to a patient [SIDE BAR: fMRI] | 3.54        |
| •                                                      | Know that treatment decisions require knowledge of the disease and the patient.                                                                                                                                                                         | 3.62        |
| <b>4. Team communication</b>                           | <b>4. Team communication</b>                                                                                                                                                                                                                            | <b>3.51</b> |
| •                                                      | Know that care of chronic pain patients requires a multi-disciplinary approach                                                                                                                                                                          | 3.69        |
| •                                                      | Know the disciplines most often involved in caring for pain patients                                                                                                                                                                                    | 3.62        |
| •                                                      | Demonstrate effective strategies for written communication with other specialists                                                                                                                                                                       | 3.38        |
| •                                                      | Recognize the central importance of documenting pain assessment and re-assessment                                                                                                                                                                       | 3.54        |
| •                                                      | Demonstrate awareness of the need to document substance abuse                                                                                                                                                                                           | 3.62        |

|                                                   |                                                                                                                                                                           |             |
|---------------------------------------------------|---------------------------------------------------------------------------------------------------------------------------------------------------------------------------|-------------|
|                                                   | assessment                                                                                                                                                                |             |
| <b>5. Counseling pain patients</b>                | <b>5. Counseling pain patients</b>                                                                                                                                        | <b>3.52</b> |
| •                                                 | Know the importance of physician counseling and techniques for communicating                                                                                              | 3.62        |
| •                                                 | Demonstrate the ability to communicate the importance of collaborative management                                                                                         | 3.54        |
| •                                                 | Demonstrate effective counseling strategies: collaboration, self-management                                                                                               | 3.46        |
| •                                                 | Recognize that the ability to counsel appropriately requires knowledge and skill                                                                                          | 3.46        |
| <b>6. Prescribing skills</b>                      | <b>6. Prescribing skills</b>                                                                                                                                              | <b>3.79</b> |
| •                                                 | Correctly complete a model prescription including name, date, formulation, dosing instructions, necessary caveats, amount, refills, signature and identifying information | 3.79        |
| •                                                 | Demonstrate how to counsel about anticipated or potentially dangerous side effects                                                                                        | 3.86        |
| •                                                 | Demonstrate use of appropriate laxative regimen when initiating or continuing opiates                                                                                     | 3.71        |
| <b>Treatment/Management</b>                       |                                                                                                                                                                           |             |
| <b>1. Medical/Pharmacological</b>                 | <b>1. Medical/Pharmacological</b>                                                                                                                                         | <b>3.45</b> |
| •                                                 | Recognize that some pain problems are complex and may require poly-pharmacy                                                                                               | 3.57        |
| •                                                 | Know the relative indications for each of the major classes of analgesic medications                                                                                      | 3.57        |
| <b>2. Nerve blocks and stimulation techniques</b> | <b>2. Nerve blocks and stimulation techniques</b>                                                                                                                         | <b>2.67</b> |
| <b>3. Surgical management</b>                     | <b>3. Surgical management</b>                                                                                                                                             | <b>2.79</b> |
| <b>4. Rehabilitation (including Acupuncture)</b>  | <b>4. Rehabilitation (including Acupuncture)</b>                                                                                                                          | <b>2.93</b> |
| <b>5. Clinical Psychological</b>                  | <b>5. Clinical Psychological</b>                                                                                                                                          | <b>3.27</b> |
| •                                                 | Know that chronic pain influences the psychological characteristics of patients                                                                                           | 3.69        |
| <b>Specific Pain Diseases</b>                     |                                                                                                                                                                           |             |
| <b>1. Acute and surgical pain</b>                 | <b>1. Acute and surgical pain</b>                                                                                                                                         | <b>3.40</b> |
| •                                                 | Know that acute pain is very prevalent                                                                                                                                    | 3.75        |

|                                |                                                                                                                                                                                                                                                  |             |
|--------------------------------|--------------------------------------------------------------------------------------------------------------------------------------------------------------------------------------------------------------------------------------------------|-------------|
| •                              | Be familiar with strategies for pain management in treatment of sprains and strains                                                                                                                                                              | 3.83        |
| •                              | Be able to distinguish the essential features of superficial cutaneous pain from deep somatic pain, e.g., viscerotomes, myotomes, sclerotomes and dermatomes and recognize that referred pain is perceived at a distance from the effected organ | 3.62        |
| <b>3. Spine pain</b>           | <b>3. Spine pain</b>                                                                                                                                                                                                                             | <b>3.61</b> |
| •                              | Know that multiple structures in the spine are innervated, e.g., bones, discs, nerves, muscles; and that these can all contribute to spine pain                                                                                                  | 3.69        |
| •                              | Know the basic pattern of sensory dermatomes, the rationale for testing reflexes and the basic mechanics of the straight leg raise exam and basic provocative maneuvers for neck pain                                                            | 3.71        |
| •                              | Be able to discuss differences and similarities in the spine pain arising from herniated discs, epidural abscess and Guillian-Barre syndrome                                                                                                     | 3.43        |
| <b>5. Neuropathic pain</b>     | <b>5. Neuropathic pain</b>                                                                                                                                                                                                                       | <b>3.43</b> |
| •                              | Know the definition of neuropathic pain, recognize the special pharmacology                                                                                                                                                                      | 3.64        |
| •                              | Understand that although neuropathic pain can arise from different levels of the nervous system, some areas are more common as pain generators                                                                                                   | 3.43        |
| •                              | Know properties of common neuropathic phenomena, e.g. carpal tunnel, sciatica                                                                                                                                                                    | 3.36        |
| <b>6. Oncologic pain</b>       | <b>6. Oncologic pain</b>                                                                                                                                                                                                                         | <b>3.32</b> |
| •                              | Be familiar with the WHO pain ladder approach to treatment and recent modifications to that approach advocating entry at a higher step for severe pain                                                                                           | 3.64        |
| <b>7. Visceral pain</b>        | <b>7. Visceral pain</b>                                                                                                                                                                                                                          | <b>3.43</b> |
| •                              | Know the major structures responsible for visceral pain                                                                                                                                                                                          | 3.57        |
| •                              | Know the primary clinical characteristics of visceral pain and some treatments                                                                                                                                                                   | 3.57        |
| <b>8. Musculoskeletal pain</b> | <b>8. Musculoskeletal pain</b>                                                                                                                                                                                                                   | <b>3.52</b> |
| •                              | Know that osteoarthritis (OA) is the most common cause of chronic                                                                                                                                                                                | 3.64        |

|                                                          |                                                                                                                                                            |             |
|----------------------------------------------------------|------------------------------------------------------------------------------------------------------------------------------------------------------------|-------------|
|                                                          | pain worldwide                                                                                                                                             |             |
| •                                                        | Know that multiple modalities of treatment are appropriate for treating osteoarthritis                                                                     | 3.71        |
| •                                                        | Know that pharmacological management can use local and systemic agents                                                                                     | 3.79        |
| •                                                        | Know that surgical intervention may play a critical role in pain relief in OA                                                                              | 3.25        |
| <b>9. Pain in older adults</b>                           | <b>9. Pain in older adults</b>                                                                                                                             | <b>3.43</b> |
| •                                                        | Know the basic prevalence of major causes of pain in the older adult population                                                                            | 3.57        |
| •                                                        | Be aware that pain processing and pain communication may change with dementing illness                                                                     | 3.50        |
| •                                                        | Know that metabolism of some pain-active medications changes with age                                                                                      | 3.50        |
| <b>Pain Challenges</b>                                   |                                                                                                                                                            |             |
| <b>3. Drug Addiction</b>                                 | <b>3. Drug Addiction</b>                                                                                                                                   | <b>3.55</b> |
| •                                                        | Know the definitions of addiction, tolerance, substance abuse and dependence                                                                               | 3.93        |
| •                                                        | Know the fundamental elements of the reward pathways                                                                                                       | 3.57        |
| •                                                        | Be aware of the scope of prescription and non-prescription drug abuse in the U.S.                                                                          | 3.71        |
| •                                                        | Be aware of patterns of drug diversion and recent actions by the DEA                                                                                       | 3.57        |
| <b>4. Co-morbid illness</b>                              | <b>4. Co-morbid illness</b>                                                                                                                                | <b>3.58</b> |
| •                                                        | Know that there is a relationship between pain and depression; and that anxiety syndromes, somatoform disorder and substance abuse impact on pain patients | 3.69        |
| •                                                        | Know that medical co-morbidities often determine pharmacological treatment of pain                                                                         | 3.67        |
| •                                                        | Be aware of the relationship of domestic abuse and chronic pain                                                                                            | 3.38        |
| <b>5. Medico-legal, i.e. licensing and documentation</b> | <b>5. Medico-legal, i.e. licensing and documentation</b>                                                                                                   | <b>3.38</b> |
| •                                                        | Know the obligations for credentialing and documentation of controlled substances                                                                          | 3.58        |

|                                                                            |                                                                                                                                                                 |             |
|----------------------------------------------------------------------------|-----------------------------------------------------------------------------------------------------------------------------------------------------------------|-------------|
| •                                                                          | Know the obligations for treatment of pain and the implications of under-treatment                                                                              | 3.58        |
| •                                                                          | Recognize appropriate and inappropriate strategies for documenting pain treatment                                                                               | 3.50        |
| <b>6. Pain emergencies</b>                                                 | <b>6. Pain emergencies</b>                                                                                                                                      | <b>3.50</b> |
| •                                                                          | Be familiar with common pain emergencies in each major organ system                                                                                             | 3.67        |
| •                                                                          | Know the first steps in beginning the evaluation of major pain emergencies including head pain, back pain chest pain, abdominal pain, pelvis pain and limb pain | 3.83        |
| <b>7. Cognitively impaired populations</b>                                 | <b>7. Cognitively impaired populations</b>                                                                                                                      | <b>3.67</b> |
| •                                                                          | Know that patients with impaired communication still experience pain                                                                                            | 3.83        |
| •                                                                          | Be familiar with alternative strategies for assessing and treating pain                                                                                         | 3.50        |
| <b>8. Complimentary and Alternative Approaches (including acupuncture)</b> | <b>8. Complimentary and Alternative Approaches (including acupuncture)</b>                                                                                      | <b>2.72</b> |
| <b>9. Ethics of pain treatment and research</b>                            | <b>9. Ethics of pain treatment and research</b>                                                                                                                 | <b>3.38</b> |
| •                                                                          | Know that experimentation in animals and humans is strictly regulated                                                                                           | 3.33        |
| •                                                                          | Recognize the human right to a reduction of suffering                                                                                                           | 3.42        |
| <b>III. Clinical Training (Year IV):</b>                                   |                                                                                                                                                                 |             |
| <b>Advanced topics in Pain Medicine</b>                                    |                                                                                                                                                                 |             |
| <b>1. Clinical skills</b>                                                  | <b>1. Clinical skills</b>                                                                                                                                       | <b>3.64</b> |
| •                                                                          | Be able to perform rapid and comprehensive pain assessment                                                                                                      | 3.64        |
| <b>2. Clinical reasoning</b>                                               | <b>2. Clinical reasoning</b>                                                                                                                                    | <b>3.61</b> |
| •                                                                          | Formulate a pain differential diagnosis                                                                                                                         | 3.71        |
| •                                                                          | Exercise newly acquired knowledge of pain through case histories and laboratory work                                                                            | 3.50        |
| <b>3. Core knowledge</b>                                                   | <b>3. Core knowledge</b>                                                                                                                                        | <b>3.74</b> |
| •                                                                          | Show a foundation knowledge of pain anatomy and physiology                                                                                                      | 3.64        |
| •                                                                          | Exhibit knowledge of major pharmacological pain treatments and their side effects                                                                               | 3.79        |
| •                                                                          | Exhibit knowledge of principal non-pharmacological pain treatments                                                                                              | 3.79        |



|                                              |                                                                                                                                                                 |             |
|----------------------------------------------|-----------------------------------------------------------------------------------------------------------------------------------------------------------------|-------------|
| <b>4. Critical and cutting edge entities</b> | <b>4. Critical and cutting edge entities</b>                                                                                                                    | <b>3.38</b> |
| •                                            | Be familiar with diagnosis and initial management of pain complaints with catastrophic potential, e.g. leg pain/DVT, headache/SAH, chest pain/aortic dissection | 3.86        |
| •                                            | Be aware of selected pain conditions that represent the extremes of chronic pain, e.g. CRPS, PHN, phantom pain and trigeminal neuralgia                         | 3.43        |
| •                                            | Be aware of literature suggesting that aggressive, early pain management lessens chronic pain                                                                   | 3.50        |
| <b>5. Communication</b>                      | <b>5. Communication</b>                                                                                                                                         | <b>3.82</b> |
| •                                            | Demonstrate skills necessary to communicate with patients about pain                                                                                            | 3.86        |
| •                                            | Be able to communicate with other healthcare providers about pain                                                                                               | 3.79        |
| <b>6. Compassionate care and empathy</b>     | <b>6. Compassionate care and empathy</b>                                                                                                                        | <b>3.93</b> |
| •                                            | Demonstrate knowledge of and promote compassionate care practices                                                                                               | 3.93        |
| •                                            | Display empathetic responses to patients with pain as a primary complaint                                                                                       | 3.93        |

Moderately ranking learning objectives:

|                                                 |                                  |                                                                                                                                                              |
|-------------------------------------------------|----------------------------------|--------------------------------------------------------------------------------------------------------------------------------------------------------------|
| I. Scientific Foundations of Medicine (Year I): |                                  |                                                                                                                                                              |
|                                                 |                                  | <b>Basic Neurobiology of Pain pathways</b>                                                                                                                   |
| 0.5                                             | <b>1. Anatomy and Physiology</b> | <b>1. Anatomy and Physiology</b>                                                                                                                             |
|                                                 | •                                | Know some specific features of primary afferent neurons involved in pain signaling                                                                           |
| 3                                               |                                  | 3.14                                                                                                                                                         |
| 8.5                                             | <b>2. Neurochemistry</b>         | <b>2. Neurochemistry</b>                                                                                                                                     |
|                                                 | •                                | Understand that descending inhibition is mediated by specific neurotransmitters released in response to excitation of neurons in specific supraspinal nuclei |
| 11                                              |                                  | 3.29                                                                                                                                                         |
| 12                                              | •                                | Recognize that descending facilitation of pain processing occurs via                                                                                         |
|                                                 |                                  | 3.29                                                                                                                                                         |

distinct neurotransmitters

|       |                                                                      |                                                                                                                                                                             |             |
|-------|----------------------------------------------------------------------|-----------------------------------------------------------------------------------------------------------------------------------------------------------------------------|-------------|
| 12.2  | II. Pain Intercession (Year I (late)):                               |                                                                                                                                                                             |             |
| 12.4  |                                                                      | <b>Pain Core</b>                                                                                                                                                            |             |
| 12.5  | <i>1. Epidemiology, public health and multicultural perspectives</i> | <i>1. Epidemiology, public health and multicultural perspectives</i>                                                                                                        | <b>3.55</b> |
| 17    | •                                                                    | Recognize that different cultures may ascribe different meaning to pain                                                                                                     | 3.36        |
| 19    | •                                                                    | Identify initiatives to educate about pain and prevent chronic pain                                                                                                         | 3.36        |
| 19.5  | <i>2. Pain terminology and pain assessment</i>                       | <i>2. Pain terminology and pain assessment</i>                                                                                                                              | <b>3.43</b> |
| 24    | •                                                                    | Understand basic concepts of pain measurement                                                                                                                               | 3.64        |
| 43.2  |                                                                      | <b>Pharmacology</b>                                                                                                                                                         |             |
| 43.5  | <i>1. COX inhibitors</i>                                             | <i>1. COX inhibitors</i>                                                                                                                                                    | <b>3.44</b> |
| 44    | •                                                                    | Know the classifications of major analgesics by specificity of COX inhibition                                                                                               | 3.57        |
| 82.5  | <i>4. Team communication</i>                                         | <i>4. Team communication</i>                                                                                                                                                | <b>3.51</b> |
| 86    | •                                                                    | Identify effective strategies for non-written communication with other care providers                                                                                       | 3.23        |
| 95.2  |                                                                      | <b>Treatment/Management</b>                                                                                                                                                 |             |
| 95.5  | <i>1. Medical/Pharmacological</i>                                    | <i>1. Medical/Pharmacological</i>                                                                                                                                           | <b>3.45</b> |
| 97    | •                                                                    | Demonstrate effective strategies for assessing potential drug interactions                                                                                                  | 3.43        |
| 118.5 | <i>2. Pediatric pain</i>                                             | <i>2. Pediatric pain</i>                                                                                                                                                    | <b>3.17</b> |
| 119   | •                                                                    | Know that the ability to communicate pain is age dependent and be familiar with multiple age appropriate pain assessment strategies                                         | 3.46        |
| 123   | •                                                                    | Know that sickle cell disease represents an important pain management challenge                                                                                             | 3.31        |
| 126.5 | <i>4. Headache</i>                                                   | <i>4. Headache</i>                                                                                                                                                          | <b>3.17</b> |
| 127   | •                                                                    | Know the principle distinguishing characteristics of migraine headache, subarachnoid hemorrhage headache, brain tumor associate headache and headache of temporal arteritis | 3.43        |
| 140.5 | <i>8. Musculoskeletal pain</i>                                       | <i>8. Musculoskeletal pain</i>                                                                                                                                              | <b>3.52</b> |
| 145   | •                                                                    | Recognize other common causes of bone pain and arthralgias, i.e. RA,                                                                                                        | 3.21        |

Lyme

|       |                                                         |                                                                                                                                          |             |
|-------|---------------------------------------------------------|------------------------------------------------------------------------------------------------------------------------------------------|-------------|
| 145.5 | <b>9. Pain in older adults</b>                          | <b>9. Pain in older adults</b>                                                                                                           | <b>3.43</b> |
| 150   | •                                                       | Recognize that some pain treatments elicit specific concerns that increase with aging                                                    | 3.29        |
| 150.2 |                                                         | <b>Pain Challenges</b>                                                                                                                   |             |
| 150.5 | <b>1. Difficult patient, Personality d/o</b>            | <b>1. Difficult patient, Personality d/o</b>                                                                                             | <b>3.39</b> |
| 151   | •                                                       | Identify personality characteristics that may be present in difficult patients                                                           | 3.43        |
| 152   | •                                                       | Identify emotional traits that may characterize difficult patients, e.g. catastrophizing                                                 | 3.36        |
| 153   | •                                                       | Understand that chronic pain is a very severe stressor                                                                                   | 3.43        |
| 154   | •                                                       | Be aware that trait characteristics may change in response to chronic pain                                                               | 3.36        |
| 154.5 | <b>2. Employment issues (impairment and litigation)</b> | <b>2. Employment issues (impairment and litigation)</b>                                                                                  | <b>3.15</b> |
| 155   | •                                                       | Know the definitions of impairment, disability and handicap; know that there are multiple scales for assessing impairment and disability | 3.38        |
| 157   | •                                                       | Know that litigation has multiple effects on recovery and response to pain treatments                                                    | 3.15        |

Low ranking learning objectives (for medical students, may be more appropriate to more advanced learners):

|                                                        |                                  |                                                                       |             |
|--------------------------------------------------------|----------------------------------|-----------------------------------------------------------------------|-------------|
| <b>I. Scientific Foundations of Medicine (Year I):</b> |                                  |                                                                       |             |
| <b>Basic Neurobiology of Pain pathways</b>             |                                  |                                                                       |             |
| 0.5                                                    | <b>1. Anatomy and Physiology</b> | <b>1. Anatomy and Physiology</b>                                      | <b>3.15</b> |
| 2                                                      | •                                | Know basic properties of multiple classes of primary afferent neurons | 3.00        |
| 4                                                      | •                                | Know the organization of the spinal cord into Rexed laminae           | 3.07        |
| 5                                                      | •                                | Know the role of the specific dorsal horn laminae in pain signaling   | 3.00        |

|      |                                                                      |                                                                                                                                                                          |             |
|------|----------------------------------------------------------------------|--------------------------------------------------------------------------------------------------------------------------------------------------------------------------|-------------|
| 6    | •                                                                    | Understand that ascending pain transmission occurs by oligo- and poly- synaptic pathways; know key pathway components and that these pathways are under ongoing revision | 2.93        |
| 8    | •                                                                    | Know the role of major specific nuclei in the brain and brain stem controlling descending inhibition and facilitation of pain signals                                    | 3.00        |
| 8.5  | <b>2. Neurochemistry</b>                                             | <b>2. Neurochemistry</b>                                                                                                                                                 | <b>3.29</b> |
| 10   | •                                                                    | Know the principle neurotransmitters and receptors/molecular pathways responsible for nociceptive signaling in the dorsal horn                                           | 3.21        |
| 12.2 | II. Pain Intersession (Year I (late)):                               |                                                                                                                                                                          |             |
| 12.4 | <b>Pain Core</b>                                                     |                                                                                                                                                                          |             |
| 12.5 | <b>1. Epidemiology, public health and multicultural perspectives</b> | <b>1. Epidemiology, public health and multicultural perspectives</b>                                                                                                     | <b>3.55</b> |
| 16   | •                                                                    | Know the prevalence of pain in various socioeconomic and ethnic groups                                                                                                   | 3.07        |
| 19.5 | <b>2. Pain terminology and pain assessment</b>                       | <b>2. Pain terminology and pain assessment</b>                                                                                                                           | <b>3.43</b> |
| 22   | •                                                                    | Know the major historical landmarks in the evolution of understanding pain                                                                                               | 2.64        |
| 23   | •                                                                    | Know of and how to apply pain assessment tools used commonly today                                                                                                       | 3.43        |
| 25   | •                                                                    | Be familiar with a variety of outcome measures used in clinical studies of pain                                                                                          | 3.14        |
| 26   | •                                                                    | Be familiar with different strategies for communicating about pain for special populations                                                                               | 3.43        |
| 26.5 | <b>3. Approach to the patient with pain</b>                          | <b>3. Approach to the patient with pain</b>                                                                                                                              | <b>3.45</b> |
| 28   | •                                                                    | Know the Pain Alphabet (De Gowan): Q-quality, R-region, S-severity, T-timing                                                                                             | 3.29        |
| 29   | •                                                                    | Know the expanded Pain Alphabet: U-usually associated with, V-very much better with, W-worse with, X-expect to treat, Y-as in “you be nice” and Z-zebras                 | 2.86        |
| 30   | •                                                                    | Be familiar with basic strategies for implementing qualitative scales of pain measurement                                                                                | 3.07        |
| 33   | •                                                                    | Know some basic guidelines for pain treatment and monitoring for efficacy, e.g., how to conduct an adequate treatment trial,                                             | 3.36        |

importance of side effect warnings and use of pain diary

|      |                                                  |                                                                                                                                                                                  |             |
|------|--------------------------------------------------|----------------------------------------------------------------------------------------------------------------------------------------------------------------------------------|-------------|
| 33.5 | <b>4. Pain Psychophysics and mechanisms</b>      | <b>4. Pain Psychophysics and mechanisms</b>                                                                                                                                      | <b>3.31</b> |
| •    |                                                  |                                                                                                                                                                                  |             |
| 34   |                                                  | Know that use of the NRS to measure pain intensity results in valid stimulus response curve                                                                                      | 2.93        |
| •    |                                                  |                                                                                                                                                                                  |             |
| 35   |                                                  | Demonstrate insight into the wide variability of individual human experience of pain                                                                                             | 3.43        |
| •    |                                                  |                                                                                                                                                                                  |             |
| 36   |                                                  | Understand that various pain modalities produce distinct subjective sensations best reflected in the words used to describe the quality of the feeling experienced               | 3.29        |
| 43.2 |                                                  | <b>Pharmacology</b>                                                                                                                                                              |             |
| 43.5 | <b>1. COX inhibitors</b>                         | <b>1. COX inhibitors</b>                                                                                                                                                         | <b>3.44</b> |
| •    |                                                  |                                                                                                                                                                                  |             |
| 46   |                                                  | Know the metabolism of COX1/2 inhibitors and how this limits their use                                                                                                           | 3.07        |
| •    |                                                  |                                                                                                                                                                                  |             |
| 47   |                                                  | Know the major side effects of COX1/2 inhibitors and potential for allergy                                                                                                       | 3.29        |
| 49.5 | <b>2. Neuromodulating agents</b>                 | <b>2. Neuromodulating agents</b>                                                                                                                                                 | <b>3.63</b> |
| •    |                                                  |                                                                                                                                                                                  |             |
| 53   |                                                  | Know that most newer antidepressants do not relieve pain, but selected agents can                                                                                                | 3.43        |
| 61.5 | <b>4. Applied basic science/drug development</b> | <b>4. Applied basic science/drug development</b>                                                                                                                                 | <b>2.59</b> |
| •    |                                                  |                                                                                                                                                                                  |             |
| 62   |                                                  | Know there is a vast research enterprise seeking out novel therapies for pain                                                                                                    | 2.57        |
| •    |                                                  |                                                                                                                                                                                  |             |
| 63   |                                                  | Be familiar with a variety of outcome measures used in clinical studies of pain                                                                                                  | 2.71        |
| •    |                                                  |                                                                                                                                                                                  |             |
| 64   |                                                  | Know that although specific neurotrophic factors are yet to be successful in clinical trials of pain treatment, interest remains high in neurotrophin signaling and transduction | 2.43        |
| •    |                                                  |                                                                                                                                                                                  |             |
| 65   |                                                  | Know the major classes of neurotrophic factors relevant to pain and the basic features of the signaling pathways for each class                                                  | 2.64        |
| •    |                                                  |                                                                                                                                                                                  |             |
| 66   |                                                  | Be aware of recent developments pertaining to cannabinoids, N-type calcium channels and vanilloid-based (capsaicin) treatments                                                   | 2.57        |
| 66.2 |                                                  | <b>Clinical Skills</b>                                                                                                                                                           |             |
| 78.5 | <b>3. Assessment decisions and treatment</b>     | <b>3. Assessment decisions and treatment decisions</b>                                                                                                                           | <b>3.46</b> |

|       |                                                   |                                                                                                                                                                                                                                |             |
|-------|---------------------------------------------------|--------------------------------------------------------------------------------------------------------------------------------------------------------------------------------------------------------------------------------|-------------|
|       | <i>decisions</i>                                  |                                                                                                                                                                                                                                |             |
| 82    | •                                                 | Know some formal models of medical decision-making and recognize that patients often represent a blend of the explicitly modeled characteristics.                                                                              | 3.00        |
| 95.2  |                                                   | <b>Treatment/Management</b>                                                                                                                                                                                                    |             |
| 95.5  | <b>1. Medical/Pharmacological</b>                 | <b>1. Medical/Pharmacological</b>                                                                                                                                                                                              | <b>3.45</b> |
| 99    | •                                                 | Recognize an appropriate plan to monitor a patient for idiosyncratic side effects                                                                                                                                              | 3.21        |
| 99.5  | <b>2. Nerve blocks and stimulation techniques</b> | <b>2. Nerve blocks and stimulation techniques</b>                                                                                                                                                                              | <b>2.67</b> |
| 100   | •                                                 | Know the usual indications for a peripheral nerve block, recognize appropriate agents for injection and outline a strategy to minimize placebo effects [Evidence-based Medicine]                                               | 2.79        |
| 101   | •                                                 | Be able to describe the purpose of a sympathetic block and anticipated results                                                                                                                                                 | 2.79        |
| 102   | •                                                 | Be able to identify important sites where stimulation techniques can be applied                                                                                                                                                | 2.43        |
| 102.5 | <b>3. Surgical management</b>                     | <b>3. Surgical management</b>                                                                                                                                                                                                  | <b>2.79</b> |
| 103   | •                                                 | Demonstrate knowledge of some selected surgical procedures for the treatment of pain                                                                                                                                           | 2.57        |
| 104   | •                                                 | Know that some forms of surgical management may be highly effective for palliative relief of cancer pain but may be less useful for longer term management                                                                     | 3.00        |
| 104.5 | <b>4. Rehabilitation (including Acupuncture)</b>  | <b>4. Rehabilitation (including Acupuncture)</b>                                                                                                                                                                               | <b>2.93</b> |
| 105   | •                                                 | Know the principle modalities of treatment used in the rehabilitative treatment of pain                                                                                                                                        | 3.07        |
| 106   | •                                                 | Know how to write a request for rehabilitation therapies                                                                                                                                                                       | 2.93        |
| 107   | •                                                 | Recognize appropriate conservative treatments that can be recommended to patients                                                                                                                                              | 3.14        |
| 108   | •                                                 | Be familiar with the NIH consensus statement on acupuncture especially regarding efficacy for specific disorders and the biological effects, know that classic acupuncture is based on traditional Chinese medicine principles | 2.57        |
| 108.5 | <b>5. Clinical Psychological</b>                  | <b>5. Clinical Psychological</b>                                                                                                                                                                                               | <b>3.27</b> |

|       |   |                                                                                                                                                                     |             |
|-------|---|---------------------------------------------------------------------------------------------------------------------------------------------------------------------|-------------|
| 109   | • | Know several clinical psychological methods for the treatment of chronic pain                                                                                       | 3.08        |
| 111   | • | Know that specific clinical psychological treatments have established efficacy                                                                                      | 3.23        |
| 112   | • | Identify psychological factors the effect pain tolerance, thresholds and behavior                                                                                   | 3.08        |
| 112.2 |   | <b>Specific Pain Diseases</b>                                                                                                                                       |             |
| 112.5 |   | <b>1. Acute and surgical pain</b>                                                                                                                                   | <b>3.40</b> |
| 116   | • | Recognize the neurobiological, endocrine and metabolic responses to pain/injury, especially segmental/supra-segmental reflexes, increases in cortisol and catechols | 3.08        |
| 117   | • | Know that multiple approaches are used for surgical pain and these include oral, i.v., local and epidural administration of analgesic and anti-inflammatory agents  | 3.08        |
| 118   | • | Be aware of studies showing that pre-medication and rigorous pain control decrease the incidence of chronic pain and improve functional measures                    | 3.08        |
| 118.5 |   | <b>2. Pediatric pain</b>                                                                                                                                            | <b>3.17</b> |
| 120   | • | Know several developmental milestones regarding communication of pain                                                                                               | 3.08        |
| 121   | • | Know the scientific evidence for stress response to pain in neonates                                                                                                | 2.77        |
| 122   | • | Know that there are methods for the safe pain management in children and infants                                                                                    | 3.23        |
| 126.5 |   | <b>4. Headache</b>                                                                                                                                                  | <b>3.17</b> |
| 128   | • | Know the indications for episodic vs. prophylactic treatment of migraine H/A                                                                                        | 2.79        |
| 129   | • | Know the indications for emergent evaluation of headache with CT, LP or MRI                                                                                         | 3.29        |
| 129.5 |   | <b>5. Neuropathic pain</b>                                                                                                                                          | <b>3.43</b> |
| 133   | • | Be aware of special neuropathic phenomena, e.g., CRPS and trigeminal neuralgia                                                                                      | 3.29        |
| 133.5 |   | <b>6. Oncologic pain</b>                                                                                                                                            | <b>3.32</b> |
| 135   | • | Know the major strategies for cancer pain (by mouth, by the clock, by the ladder)                                                                                   | 3.21        |

|       |                                                                            |                                                                                                                                                                     |             |
|-------|----------------------------------------------------------------------------|---------------------------------------------------------------------------------------------------------------------------------------------------------------------|-------------|
| 136   | •                                                                          | Recognize that alternative strategies for cancer pain management are available                                                                                      | 3.14        |
| 137   | •                                                                          | Recognize appropriate strategies to monitor for response or excess side effects                                                                                     | 3.29        |
| 137.5 | <b>7. Visceral pain</b>                                                    | <b>7. Visceral pain</b>                                                                                                                                             | <b>3.43</b> |
| 140   | •                                                                          | Be able to outline an approach to assessing selected visceral pain emergencies                                                                                      | 3.14        |
| 145.5 | <b>9. Pain in older adults</b>                                             | <b>9. Pain in older adults</b>                                                                                                                                      | <b>3.43</b> |
| 147   | •                                                                          | Be familiar with major changes in pain processing that occur with normal aging                                                                                      | 3.29        |
| 150.2 |                                                                            | <b>Pain Challenges</b>                                                                                                                                              |             |
| 154.5 | <b>2. Employment issues (impairment and litigation)</b>                    | <b>2. Employment issues (impairment and litigation)</b>                                                                                                             | <b>3.15</b> |
| 156   | •                                                                          | Understand the role of the physician in the disability determination process                                                                                        | 2.92        |
| 157.5 | <b>3. Drug Addiction</b>                                                   | <b>3. Drug Addiction</b>                                                                                                                                            | <b>3.55</b> |
| 162   | •                                                                          | Be familiar with strategies for drug testing and drug treatment contracts                                                                                           | 3.36        |
| 163   | •                                                                          | Know important literature and litigation about pain treatment with regards to addiction                                                                             | 3.14        |
| 166.5 | <b>5. Medico-legal, i.e. licensing and documentation</b>                   | <b>5. Medico-legal, i.e. licensing and documentation</b>                                                                                                            | <b>3.38</b> |
| 169   | •                                                                          | Be familiar with recent legislative and rule-making actions that impact pain care                                                                                   | 2.83        |
| 170.5 | <b>6. Pain emergencies</b>                                                 | <b>6. Pain emergencies</b>                                                                                                                                          | <b>3.50</b> |
| 173   | •                                                                          | Demonstrate knowledge of the most common pain emergencies seen in patients with AIDS                                                                                | 3.00        |
| 175.5 | <b>8. Complimentary and Alternative Approaches (including acupuncture)</b> | <b>8. Complimentary and Alternative Approaches (including acupuncture)</b>                                                                                          | <b>2.72</b> |
| 176   | •                                                                          | Know some basic information about the major types of CAM including modalities such as acupuncture, meditation, dietary supplements, manipulative methods and others | 2.92        |
| 177   | •                                                                          | Know that there is literature supporting the efficacy of acupuncture and other CAM approaches, be familiar with some major principles                               | 2.50        |



for designing these studies

•  
178 Be aware of the prevalence of CAM usage and its health economics impact 2.75

180.2 **III. Clinical Training (Year IV):**

180.4 **Advanced topics in Pain Medicine**

186.5 **4. Critical and cutting edge entities 4. Critical and cutting edge entities 3.38**

•  
188 Be aware of recent genetic insights into selected pain conditions that illuminate pathophysiological mechanisms, e.g., erythromelalgia, congenital insensitivity to pain 2.71
